# Supplementary material
Source: MDPI journal article supplement (https://www.mdpi.com/2073-4344/12/8/835)
Supplement: s1 [file s1]

## Supplementary Information

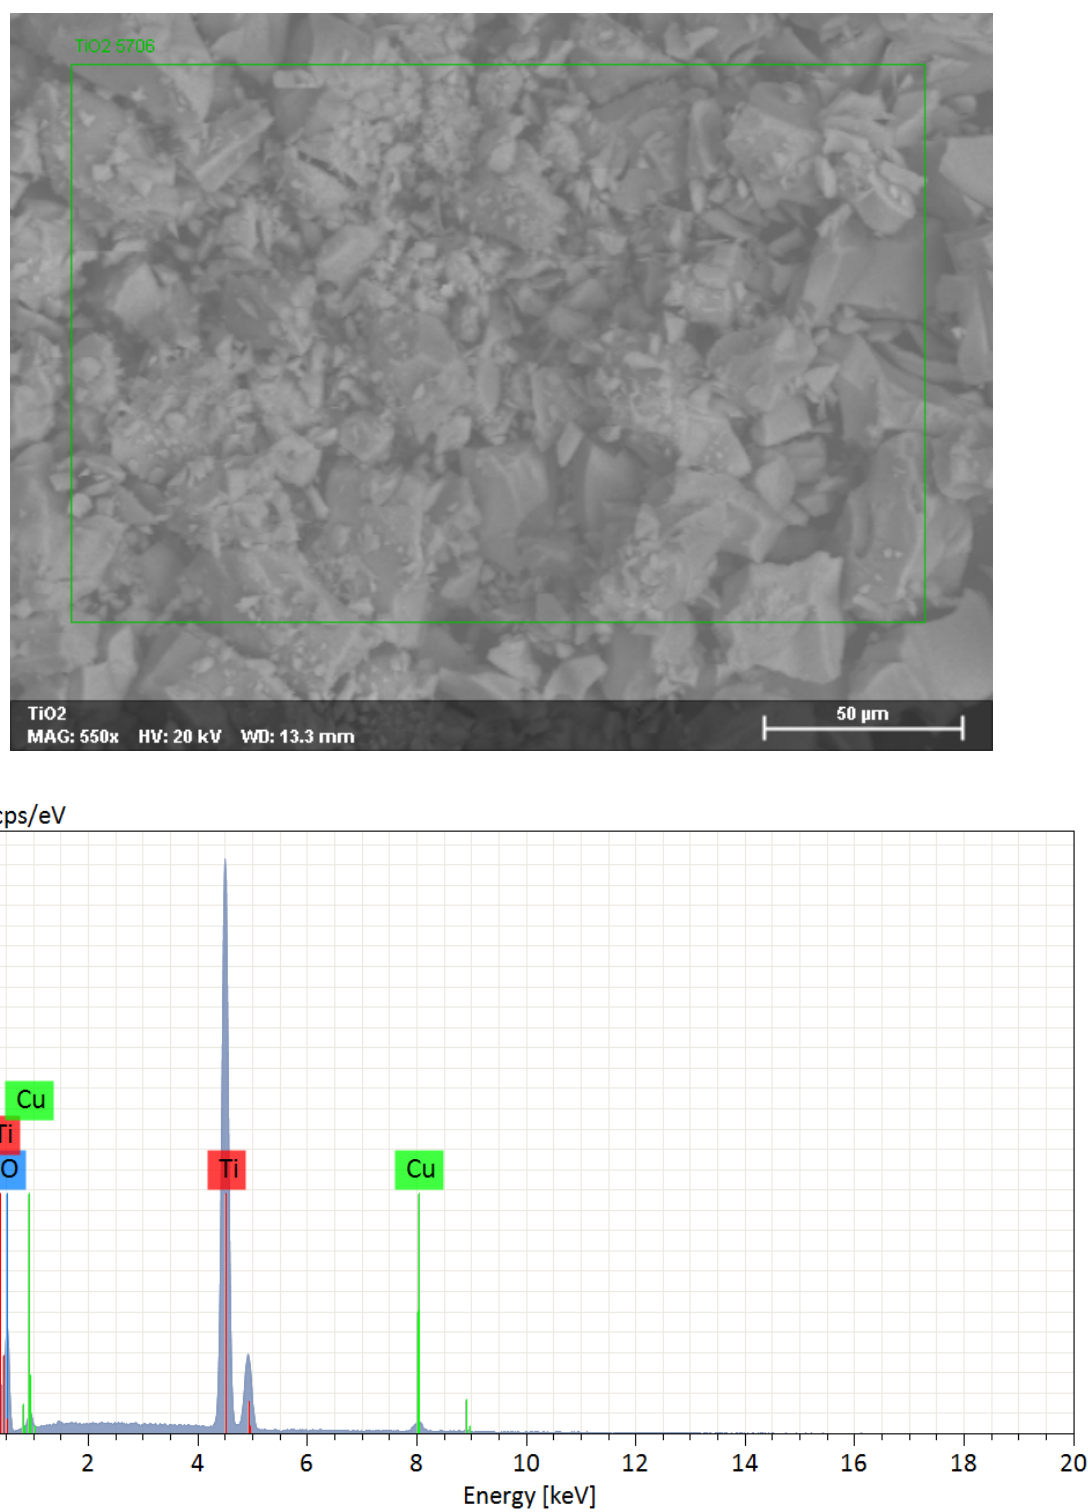

**Figure S1.** Energy Dispersive Spectroscopy analyzes for the Cu/TiO<sub>2</sub> catalyst.

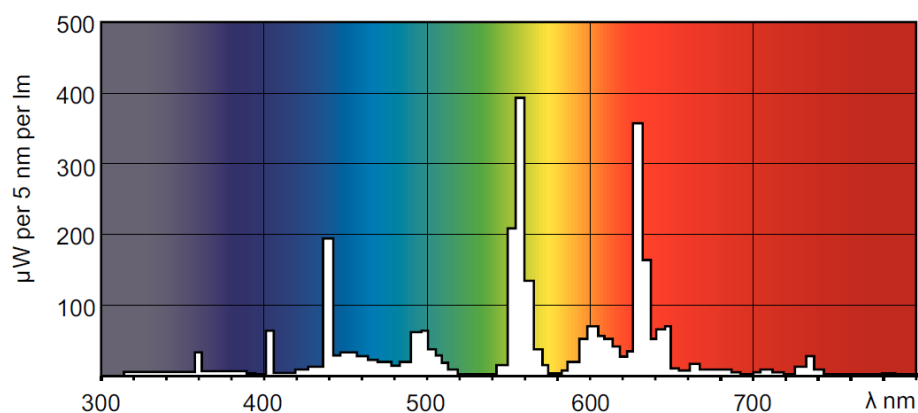

**Figure S2.** Photometric spectrum of the visible radiation lamp used during the photocatalytic tests.

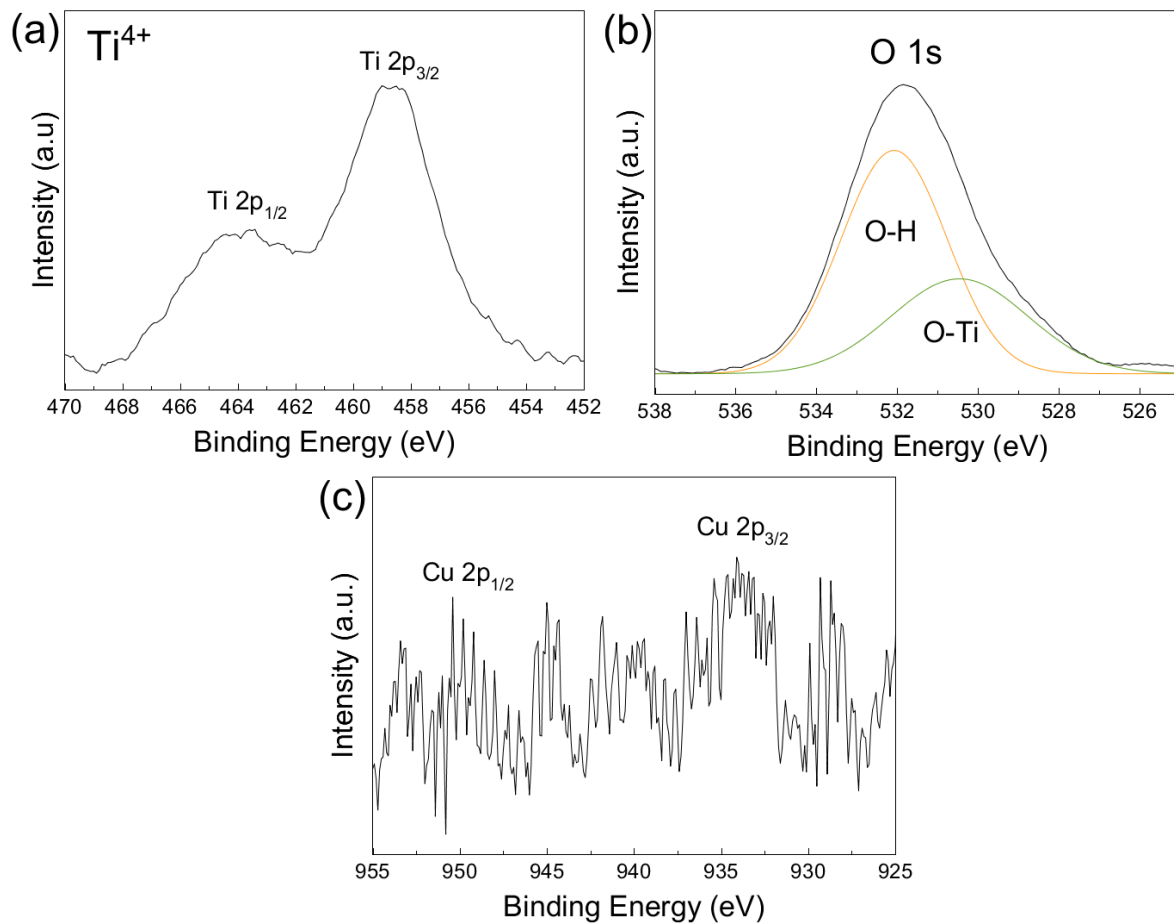

**Figure S3.** XPS spectra of (a) Ti 2p, (b) O 1s, and (c) Cu 2p for the Cu/TiO<sub>2</sub> catalyst after first use.

**Table S1. ANOVA for Quadratic model**Response 1: GCDx10<sup>4</sup>

Transform: Square Root

Constant: 0

|                  |        |    |        |        |          |             |
|------------------|--------|----|--------|--------|----------|-------------|
| <b>Model</b>     | 11.40  | 9  | 1.27   | 119.76 | < 0.0001 | significant |
| A-Catalyst       | 2.52   | 1  | 2.52   | 238.55 | < 0.0001 |             |
| B-Temperature    | 3.13   | 1  | 3.13   | 295.79 | < 0.0001 |             |
| C-Glycerol       | 2.84   | 1  | 2.84   | 268.37 | < 0.0001 |             |
| AB               | 0.0028 | 1  | 0.0028 | 0.2670 | 0.6166   |             |
| AC               | 0.6599 | 1  | 0.6599 | 62.37  | < 0.0001 |             |
| BC               | 1.38   | 1  | 1.38   | 130.67 | < 0.0001 |             |
| A <sup>2</sup>   | 0.1997 | 1  | 0.1997 | 18.87  | 0.0015   |             |
| B <sup>2</sup>   | 0.0874 | 1  | 0.0874 | 8.26   | 0.0166   |             |
| C <sup>2</sup>   | 0.2558 | 1  | 0.2558 | 24.18  | 0.0006   |             |
| <b>Residual</b>  | 0.1058 | 10 | 0.0106 |        |          |             |
| Lack of Fit      | 0.1058 | 5  | 0.0212 |        |          |             |
| Pure Error       | 0.0000 | 5  | 0.0000 |        |          |             |
| <b>Cor Total</b> | 11.51  | 19 |        |        |          |             |

Fit Statistics

|                  |        |                                |         |
|------------------|--------|--------------------------------|---------|
| <b>Std. Dev.</b> | 0.1029 | <b>R<sup>2</sup></b>           | 0.9908  |
| <b>Mean</b>      | 3.60   | <b>Adjusted R<sup>2</sup></b>  | 0.9825  |
| <b>C.V. %</b>    | 2.86   | <b>Predicted R<sup>2</sup></b> | 0.9286  |
|                  |        | <b>Adeq Precision</b>          | 48.5260 |

Response 2: FDx10<sup>4</sup>

Transform: Square Root

Constant: 0

|                 |        |    |        |        |          |             |
|-----------------|--------|----|--------|--------|----------|-------------|
| <b>Model</b>    | 36.13  | 9  | 4.01   | 214.91 | < 0.0001 | significant |
| A-Catalyst      | 12.24  | 1  | 12.24  | 655.13 | < 0.0001 |             |
| B-Temperature   | 17.51  | 1  | 17.51  | 937.07 | < 0.0001 |             |
| C-Glycerol      | 0.0488 | 1  | 0.0488 | 2.61   | 0.1373   |             |
| AB              | 0.1897 | 1  | 0.1897 | 10.15  | 0.0097   |             |
| AC              | 0.4103 | 1  | 0.4103 | 21.96  | 0.0009   |             |
| BC              | 1.67   | 1  | 1.67   | 89.37  | < 0.0001 |             |
| A <sup>2</sup>  | 0.7287 | 1  | 0.7287 | 39.01  | < 0.0001 |             |
| B <sup>2</sup>  | 1.30   | 1  | 1.30   | 69.84  | < 0.0001 |             |
| C <sup>2</sup>  | 1.85   | 1  | 1.85   | 98.81  | < 0.0001 |             |
| <b>Residual</b> | 0.1868 | 10 | 0.0187 |        |          |             |

|                  |        |    |        |  |  |  |
|------------------|--------|----|--------|--|--|--|
| Lack of Fit      | 0.1868 | 5  | 0.0374 |  |  |  |
| Pure Error       | 0.0000 | 5  | 0.0000 |  |  |  |
| <b>Cor Total</b> | 36.32  | 19 |        |  |  |  |

Fit Statistics

|                  |        |  |                                |         |
|------------------|--------|--|--------------------------------|---------|
| <b>Std. Dev.</b> | 0.1367 |  | <b>R<sup>2</sup></b>           | 0.9949  |
| <b>Mean</b>      | 6.17   |  | <b>Adjusted R<sup>2</sup></b>  | 0.9902  |
| <b>C.V. %</b>    | 2.22   |  | <b>Predicted R<sup>2</sup></b> | 0.9132  |
|                  |        |  | <b>Adeq Precision</b>          | 64.4128 |

Response 3: FAx10<sup>4</sup>

Transform: Square Root

Constant: 0

|                  |        |    |        |        |          |             |
|------------------|--------|----|--------|--------|----------|-------------|
| <b>Model</b>     | 2.78   | 9  | 0.3087 | 76.55  | < 0.0001 | significant |
| A-Catalyst       | 0.4072 | 1  | 0.4072 | 100.96 | < 0.0001 |             |
| B-Temperature    | 1.48   | 1  | 1.48   | 366.78 | < 0.0001 |             |
| C-Glycerol       | 0.2026 | 1  | 0.2026 | 50.25  | < 0.0001 |             |
| AB               | 0.0014 | 1  | 0.0014 | 0.3459 | 0.5695   |             |
| AC               | 0.1776 | 1  | 0.1776 | 44.04  | < 0.0001 |             |
| BC               | 0.3694 | 1  | 0.3694 | 91.59  | < 0.0001 |             |
| A <sup>2</sup>   | 0.0570 | 1  | 0.0570 | 14.13  | 0.0037   |             |
| B <sup>2</sup>   | 0.1010 | 1  | 0.1010 | 25.06  | 0.0005   |             |
| C <sup>2</sup>   | 0.0044 | 1  | 0.0044 | 1.09   | 0.3205   |             |
| <b>Residual</b>  | 0.0403 | 10 | 0.0040 |        |          |             |
| Lack of Fit      | 0.0403 | 5  | 0.0081 |        |          |             |
| Pure Error       | 0.0000 | 5  | 0.0000 |        |          |             |
| <b>Cor Total</b> | 2.82   | 19 |        |        |          |             |

Fit Statistics

|                  |        |  |                                |         |
|------------------|--------|--|--------------------------------|---------|
| <b>Std. Dev.</b> | 0.0635 |  | <b>R<sup>2</sup></b>           | 0.9857  |
| <b>Mean</b>      | 2.26   |  | <b>Adjusted R<sup>2</sup></b>  | 0.9728  |
| <b>C.V. %</b>    | 2.81   |  | <b>Predicted R<sup>2</sup></b> | 0.9045  |
|                  |        |  | <b>Adeq Precision</b>          | 42.3236 |
